# Supplementary material
Source: publisher figshare collection journal article supplement (https://karger.figshare.com/ndownloader/files/16869347)

## Supplementary data

**Table S1.** Thirty-nine patients who had both hepatic and extrahepatic tumors.

| <b>Extrahepatic</b><br><b>Hepatic</b> | <b>Disease control</b> | <b>Progressive disease</b> | <b>Total</b> |
|---------------------------------------|------------------------|----------------------------|--------------|
| <b>Disease control</b>                | 16                     | 4                          | 20           |
| <b>Progressive disease</b>            | 12                     | 7                          | 19           |
| <b>Total</b>                          | 29                     | 10                         | 39           |

**Table S2.** Sixteen patients who had only hepatic tumors and lung metastases at baseline.

| <div>Lung</div> <div>Hepatic</div> | Disease control | Progressive disease | Total |
|------------------------------------|-----------------|---------------------|-------|
| Disease control                    | 7               | 0                   | 7     |
| Progressive disease                | 8               | 1                   | 9     |
| Total                              | 15              | 1                   | 16    |

**Fig. S1** A representative patient with paired primary hepatocellular carcinoma (HCC) and lung metastatic samples had comparable expression of programmed death-ligand 1 (PD-L1) in both tumor cells and tumor-infiltrating immune cells. Consecutive slides of HCC in liver (A) and lung metastasis (B) were stained with H&E and PD-L1, respectively.

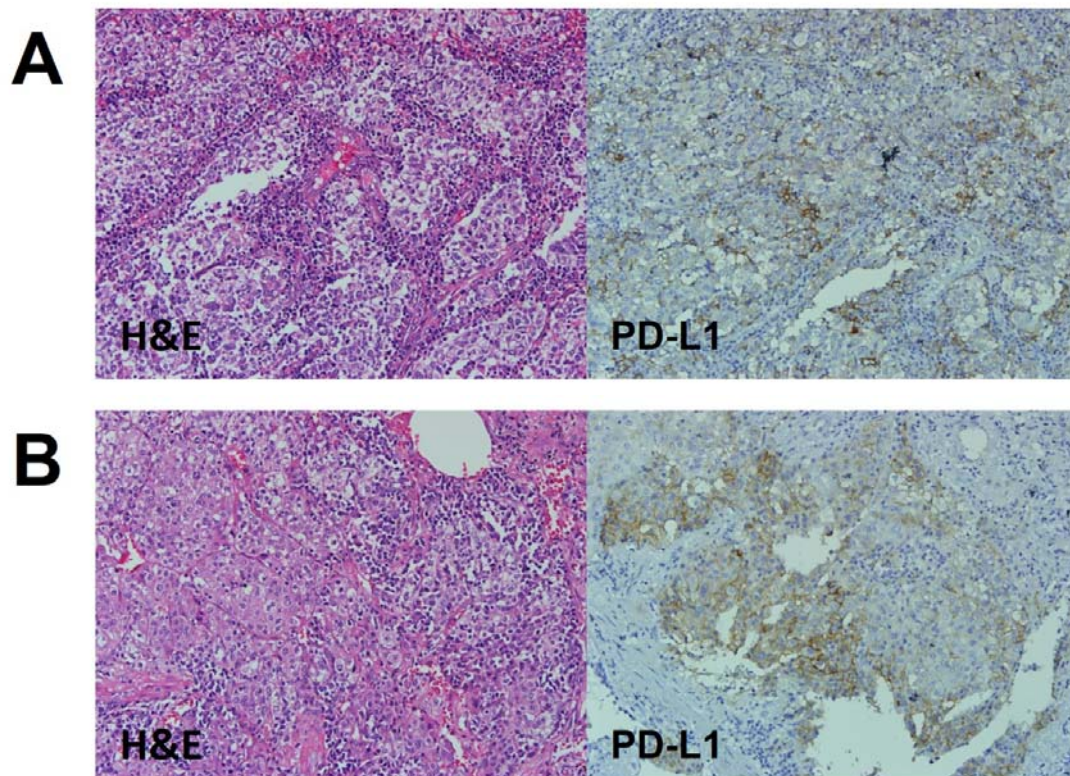

Supplement: Supplementary file 1 [file 16869347]
